# Supplementary material
Source: MDPI journal article supplement (https://www.mdpi.com/2075-163X/12/11/1446)
Supplement: s1 [file s1]

# Supplementary Materials: Mineralogical and Geochemical Characteristics of the H-Pit of the Gold Deposit, Central Thailand: A Case Study for Assessment of Acid Rock Drainage and Heavy Metal Sources

Sirawit Kaewpaluk, Abhisit Salam \*, Thitiphan Assawincharoenkij \*, Takayuki Manaka, Sopit Poompuang and Surachat Munsamai

**Table S1.** X-ray characteristics of each element in EPMA analysis.

| Element | Spectral line | Peak position (mm) | Voltage (kV) | Current (nA) | Crystal | Analysis time (s) | Background time (s) | Background intensity (cps) | Characteristic X-ray intensity (cps) | Detection Limit (wt.%) |
|---------|---------------|--------------------|--------------|--------------|---------|-------------------|---------------------|----------------------------|--------------------------------------|------------------------|
| As      | L $\alpha$    | 106.792            | 15           | 25           | TAP     | 10                | 10                  | 91.7                       | 4565.3                               | 0.04                   |
| Ag      | L $\alpha$    | 133.019            | 15           | 25           | PETJ    | 10                | 10                  | 27.1                       | 7864.8                               | 0.04                   |
| Au      | L $\alpha$    | 89.079             | 15           | 25           | LIF     | 10                | 10                  | 30.6                       | 8165.3                               | 0.45                   |
| Cd      | L $\alpha$    | 126.844            | 15           | 25           | PETJ    | 10                | 20                  | 177.3                      | 22767.2                              | 0.07                   |
| Co      | K $\alpha$    | 124.378            | 15           | 25           | LIFH    | 30                | 20                  | 22.4                       | 4767                                 | 0.02                   |
| Cr      | K $\alpha$    | 159.786            | 15           | 25           | LIF     | 15                | 20                  | 1196                       | 39893                                | 0.02                   |
| Cu      | K $\alpha$    | 107.08             | 15           | 25           | LIFH    | 30                | 20                  | 45.4                       | 6995.5                               | 0.05                   |
| Fe      | K $\alpha$    | 134.801            | 15           | 25           | LIF     | 15                | 20                  | 14.8                       | 4035.3                               | 0.05                   |
| Mn      | K $\alpha$    | 146.239            | 15           | 25           | LIFH    | 15                | 20                  | 15.1                       | 4182.5                               | 0.02                   |
| Ni      | K $\alpha$    | 115.228            | 15           | 25           | LIFH    | 10                | 20                  | 27.7                       | 8699.8                               | 0.02                   |
| Pb      | L $\alpha$    | 169.231            | 15           | 25           | PETJ    | 10                | 20                  | 34.2                       | 8110.4                               | 0.05                   |
| Zn      | K $\alpha$    | 99.931             | 15           | 25           | LIF     | 15                | 20                  | 37.4                       | 7209.2                               | 0.05                   |
| S       | K $\alpha$    | 172.474            | 15           | 25           | PETJ    | 30                | 20                  | 149.5                      | 101543.7                             | 0.01                   |

**Table S2.** Spot analysis results of Galena, sphalerite, and chalcopyrite.

| No. | As    | Cd    | Co    | Cr    | Cu    | Mn    | Ni    | Pb    | Zn    | Fe    | S     | Au    | Ag    | Total  | Comment            |
|-----|-------|-------|-------|-------|-------|-------|-------|-------|-------|-------|-------|-------|-------|--------|--------------------|
| 1   | <0.04 | <0.07 | <0.02 | 0.02  | <0.05 | <0.02 | <0.02 | 86.20 | <0.05 | 0.37  | 12.11 | <0.45 | <0.04 | 98.70  | 453-85-galena-1    |
| 2   | 0.93  | <0.07 | <0.02 | 0.03  | <0.05 | <0.02 | 0.02  | 86.63 | <0.05 | 0.83  | 12.81 | <0.45 | <0.04 | 101.25 | 453-85-galena-2    |
| 3   | 0.32  | <0.07 | <0.02 | <0.02 | <0.05 | 0.04  | 0.02  | 86.64 | <0.05 | 1.52  | 12.52 | <0.45 | <0.04 | 101.06 | 453-85-galena-3    |
| 4   | <0.04 | <0.07 | <0.02 | <0.02 | <0.05 | 0.04  | <0.02 | 87.30 | <0.05 | 0.26  | 12.41 | <0.45 | <0.04 | 100.01 | 453-85-galena-4    |
| 5   | <0.04 | <0.07 | <0.02 | <0.02 | 0.07  | <0.02 | 0.02  | 86.71 | <0.05 | 0.24  | 12.26 | <0.45 | <0.04 | 99.31  | 453-85-galena-5    |
| 6   | <0.04 | <0.07 | <0.02 | <0.02 | 0.06  | <0.02 | 0.02  | 85.79 | <0.05 | 0.20  | 12.21 | 1.28  | <0.04 | 99.55  | 453-85-galena-6    |
| 7   | <0.04 | <0.07 | <0.02 | 0.02  | 0.54  | <0.02 | <0.02 | 86.80 | 0.69  | 0.97  | 11.24 | 0.70  | <0.04 | 100.97 | 453-85-galena-7    |
| 8   | 0.05  | <0.07 | <0.02 | 0.02  | 0.05  | <0.02 | <0.02 | 86.72 | <0.05 | 0.33  | 12.69 | <0.45 | <0.04 | 99.85  | 453-85-galena-8    |
| 9   | <0.04 | <0.07 | <0.02 | 0.03  | 1.54  | <0.02 | <0.02 | 86.14 | <0.05 | 0.50  | 11.07 | 0.94  | <0.04 | 100.22 | 453-85-galena-9    |
| 10  | <0.04 | <0.07 | <0.02 | <0.02 | <0.05 | <0.02 | <0.02 | 86.13 | <0.05 | 0.61  | 11.99 | <0.45 | <0.04 | 98.73  | 397-124.6-galena-1 |
| 11  | 0.90  | <0.07 | <0.02 | <0.02 | <0.05 | <0.02 | <0.02 | 87.29 | <0.05 | 0.96  | 10.00 | 0.55  | <0.04 | 99.70  | 397-124.6-galena-2 |
| 12  | 0.98  | <0.07 | 0.02  | <0.02 | 0.06  | <0.02 | 0.04  | 86.42 | <0.05 | 0.59  | 12.54 | 0.61  | 0.13  | 101.39 | 397-124.6-galena-3 |
| 13  | 0.82  | <0.07 | <0.02 | <0.02 | <0.05 | 0.09  | 0.03  | 87.74 | <0.05 | <0.05 | 10.44 | <0.45 | <0.04 | 99.12  | 397-124.6-galena-4 |
| 14  | 0.05  | <0.07 | <0.02 | 0.02  | <0.05 | 0.04  | <0.02 | 87.05 | <0.05 | 0.10  | 10.76 | <0.45 | <0.04 | 98.02  | 397-124.6-galena-5 |
| 15  | <0.04 | <0.07 | <0.02 | 0.02  | 0.05  | <0.02 | <0.02 | 88.03 | <0.05 | 0.12  | 11.14 | <0.45 | <0.04 | 99.36  | 397-124.6-galena-6 |

|    |       |       |       |       |       |       |       |       |       |       |       |       |       |        |                         |
|----|-------|-------|-------|-------|-------|-------|-------|-------|-------|-------|-------|-------|-------|--------|-------------------------|
| 16 | 0.07  | <0.07 | <0.02 | 0.05  | <0.05 | 0.07  | <0.02 | 86.70 | 0.08  | 0.88  | 12.42 | <0.45 | <0.04 | 100.27 | 397-124.6-galena-7      |
| 17 | <0.04 | <0.07 | <0.02 | 0.02  | <0.05 | 0.03  | <0.02 | 87.13 | <0.05 | 0.79  | 12.12 | 0.46  | <0.04 | 100.55 | 397-124.6-galena-8      |
| 18 | <0.04 | <0.07 | <0.02 | 0.02  | <0.05 | <0.02 | <0.02 | 86.00 | <0.05 | 0.05  | 12.54 | <0.45 | <0.04 | 98.61  | 397-124.6-galena-9      |
| 19 | <0.04 | <0.07 | <0.02 | <0.02 | 1.21  | <0.02 | 0.02  | <0.05 | 61.83 | 3.77  | 32.31 | 0.93  | <0.04 | 100.08 | 453-85--sphalerite-1    |
| 20 | <0.04 | 0.08  | <0.02 | <0.02 | 1.65  | 0.06  | <0.02 | 0.08  | 61.41 | 3.85  | 32.70 | <0.45 | <0.04 | 99.82  | 453-85--sphalerite-2    |
| 21 | <0.04 | 0.07  | <0.02 | <0.02 | 1.88  | 0.02  | <0.02 | <0.05 | 61.64 | 3.34  | 32.85 | 0.77  | <0.04 | 100.57 | 453-85--sphalerite-3    |
| 22 | <0.04 | <0.07 | <0.02 | 0.02  | 1.99  | <0.02 | <0.02 | 0.09  | 62.50 | 1.79  | 33.92 | 0.74  | 0.07  | 101.12 | 453-85--sphalerite-4    |
| 23 | <0.04 | <0.07 | <0.02 | <0.02 | 1.45  | <0.02 | <0.02 | 0.08  | 62.88 | 1.53  | 33.35 | 0.70  | 0.15  | 100.14 | 453-85--sphalerite-5    |
| 24 | <0.04 | <0.07 | <0.02 | 0.02  | 0.92  | 0.06  | <0.02 | 0.08  | 61.72 | 1.69  | 33.52 | 0.78  | <0.04 | 98.79  | 453-85--sphalerite-6    |
| 25 | <0.04 | 0.07  | <0.02 | <0.02 | 0.83  | <0.02 | <0.02 | <0.05 | 61.96 | 2.81  | 33.29 | 0.96  | <0.04 | 99.90  | 397-124.6-sphalerite-1  |
| 26 | <0.04 | 0.12  | <0.02 | <0.02 | 0.80  | 0.07  | <0.02 | <0.05 | 61.96 | 2.83  | 33.65 | 1.39  | <0.04 | 100.83 | 397-124.6-sphalerite-2  |
| 27 | <0.04 | 0.18  | <0.02 | 0.04  | 0.98  | 0.02  | <0.02 | <0.05 | 61.70 | 2.19  | 33.49 | 0.54  | <0.04 | 99.15  | 397-124.6-sphalerite-3  |
| 28 | <0.04 | <0.07 | <0.02 | 0.02  | 1.65  | <0.02 | <0.02 | 0.05  | 61.69 | 2.50  | 33.35 | 0.99  | <0.04 | 100.25 | 397-124.6-sphalerite-4  |
| 29 | <0.04 | 0.15  | <0.02 | <0.02 | 1.11  | <0.02 | <0.02 | <0.05 | 61.79 | 2.28  | 33.38 | 0.96  | <0.04 | 99.67  | 397-124.6-sphalerite-5  |
| 30 | <0.04 | 0.17  | <0.02 | <0.02 | 0.05  | <0.02 | <0.02 | 0.04  | 61.76 | 2.44  | 33.87 | 1.36  | <0.04 | 99.68  | 397-124.6-sphalerite-6  |
| 31 | <0.04 | <0.07 | <0.02 | 0.03  | 0.54  | <0.02 | <0.02 | <0.05 | 62.53 | 2.57  | 33.52 | <0.45 | <0.04 | 99.19  | 1121-164.5-sphalerite-1 |
| 32 | <0.04 | 0.13  | <0.02 | <0.02 | 0.71  | <0.02 | 0.02  | <0.05 | 62.40 | 2.76  | 33.59 | <0.45 | <0.04 | 99.61  | 1121-164.5-sphalerite-2 |
| 33 | <0.04 | <0.07 | <0.02 | <0.02 | 1.55  | <0.02 | <0.02 | <0.05 | 62.06 | 2.75  | 33.38 | <0.45 | <0.04 | 99.74  | 1121-164.5-sphalerite-3 |
| 34 | <0.04 | <0.07 | <0.05 | <0.02 | 33.14 | <0.02 | <0.02 | <0.05 | 0.06  | 32.72 | 32.49 | <0.45 | <0.04 | 98.39  | 453-85-chalcopy-1       |
| 35 | <0.04 | <0.07 | <0.05 | <0.02 | 33.87 | <0.02 | <0.02 | <0.05 | 0.10  | 32.61 | 31.91 | 0.66  | <0.04 | 99.15  | 453-85-chalcopy-2       |
| 36 | <0.04 | <0.07 | <0.05 | <0.02 | 33.42 | <0.02 | <0.02 | <0.05 | <0.05 | 32.69 | 32.46 | <0.45 | 0.05  | 98.62  | 453-85-chalcopy-3       |
| 37 | <0.04 | <0.07 | <0.05 | <0.02 | 33.72 | <0.02 | <0.02 | <0.05 | 0.05  | 32.82 | 32.43 | <0.45 | 0.07  | 99.09  | 397-124.5-chalcopy-1    |
| 38 | <0.04 | <0.07 | <0.05 | <0.02 | 33.81 | <0.02 | <0.02 | <0.05 | 0.10  | 32.52 | 32.01 | 0.62  | <0.04 | 99.07  | 397-124.5-chalcopy-2    |
| 39 | <0.04 | <0.07 | <0.05 | <0.02 | 33.52 | <0.02 | <0.02 | <0.05 | <0.05 | 32.63 | 32.49 | <0.45 | 0.06  | 98.70  | 397-124.5-chalcopy-3    |
| 40 | <0.04 | <0.07 | <0.05 | <0.02 | 33.51 | <0.02 | <0.02 | <0.05 | <0.05 | 32.92 | 32.24 | <0.45 | 0.12  | 98.80  | 1121-164.5-chalcopy-1   |
| 41 | <0.04 | <0.07 | <0.05 | <0.02 | 33.29 | <0.02 | <0.02 | <0.05 | 0.23  | 32.12 | 32.43 | 0.76  | <0.04 | 98.84  | 1121-164.5-chalcopy-2   |
| 42 | <0.04 | <0.07 | <0.05 | <0.02 | 33.15 | <0.02 | <0.02 | 0.09  | <0.05 | 32.71 | 32.32 | <0.45 | 0.08  | 98.35  | 1121-164.5-chalcopy-3   |

Table S3. Spot analysis results of pyrite in vein (sample no. 397-124.6).

| No. | As    | Cd    | Co    | Cr    | Cu    | Mn    | Ni    | Pb    | Zn    | Fe    | S     | Au    | Ag    | Total |
|-----|-------|-------|-------|-------|-------|-------|-------|-------|-------|-------|-------|-------|-------|-------|
| 1   | <0.04 | <0.07 | <0.02 | <0.02 | <0.03 | 0.05  | <0.02 | <0.05 | <0.05 | 45.18 | 53.02 | <0.45 | <0.04 | 98.26 |
| 2   | <0.04 | <0.07 | <0.02 | 0.02  | <0.03 | 0.04  | <0.02 | <0.05 | <0.05 | 44.09 | 53.00 | <0.45 | 2.76  | 97.14 |
| 3   | 0.22  | <0.07 | <0.02 | 0.01  | <0.03 | <0.02 | <0.02 | <0.05 | <0.05 | 45.87 | 53.68 | <0.45 | <0.04 | 99.79 |
| 4   | 0.51  | <0.07 | <0.02 | <0.02 | <0.03 | 0.03  | <0.02 | <0.05 | <0.05 | 45.36 | 53.61 | <0.45 | <0.04 | 99.52 |
| 5   | 0.27  | <0.07 | <0.02 | <0.02 | 0.06  | 0.03  | <0.02 | <0.05 | <0.05 | 46.06 | 52.21 | 0.27  | <0.04 | 98.90 |
| 6   | 0.25  | <0.07 | <0.02 | <0.02 | <0.03 | <0.02 | 0.02  | <0.05 | <0.05 | 45.68 | 52.54 | <0.45 | 0.27  | 98.48 |

|    |       |       |       |       |       |       |       |       |       |       |       |       |       |        |
|----|-------|-------|-------|-------|-------|-------|-------|-------|-------|-------|-------|-------|-------|--------|
| 7  | <0.04 | <0.07 | <0.02 | <0.02 | <0.03 | <0.02 | <0.02 | <0.05 | <0.05 | 45.74 | 52.85 | <0.45 | <0.04 | 98.59  |
| 8  | <0.04 | <0.07 | <0.02 | 0.02  | 0.06  | <0.02 | <0.02 | <0.05 | <0.05 | 45.25 | 52.17 | <0.45 | 1.34  | 97.50  |
| 9  | 0.45  | <0.07 | <0.02 | <0.02 | <0.03 | 0.02  | 0.02  | <0.05 | <0.05 | 45.41 | 52.63 | <0.45 | <0.04 | 98.53  |
| 10 | 0.02  | <0.07 | <0.02 | <0.02 | 0.74  | 0.02  | <0.02 | <0.05 | <0.05 | 46.22 | 53.27 | <0.45 | <0.04 | 100.27 |
| 11 | 0.49  | <0.07 | <0.02 | <0.02 | 0.03  | <0.02 | 0.02  | <0.05 | <0.05 | 44.93 | 52.72 | <0.45 | 2.14  | 98.18  |
| 12 | 0.35  | <0.07 | <0.02 | <0.02 | <0.03 | <0.02 | <0.02 | <0.05 | <0.05 | 45.41 | 53.02 | <0.45 | <0.04 | 98.78  |
| 13 | 0.07  | <0.07 | <0.02 | <0.02 | 0.03  | 0.03  | <0.02 | <0.05 | <0.05 | 46.31 | 52.19 | <0.45 | 1.07  | 98.62  |
| 14 | 0.27  | <0.07 | <0.02 | <0.02 | <0.03 | 0.03  | <0.02 | <0.05 | <0.05 | 46.58 | 52.02 | <0.45 | <0.04 | 98.90  |
| 15 | 0.15  | <0.07 | <0.02 | 0.02  | <0.03 | 0.04  | <0.02 | <0.05 | <0.05 | 45.51 | 53.91 | <0.45 | 0.13  | 99.64  |
| 16 | <0.04 | <0.07 | <0.02 | <0.02 | <0.03 | <0.02 | <0.02 | <0.05 | <0.05 | 44.93 | 53.84 | 1.53  | <0.04 | 100.30 |
| 17 | 0.02  | <0.07 | <0.02 | <0.02 | <0.03 | 0.05  | <0.02 | <0.05 | <0.05 | 45.41 | 53.90 | <0.45 | <0.04 | 99.38  |
| 18 | 0.17  | <0.07 | <0.02 | 0.05  | 0.04  | 0.03  | <0.02 | <0.05 | <0.05 | 44.90 | 52.74 | <0.45 | 2.80  | 97.91  |
| 19 | <0.04 | <0.07 | <0.02 | 0.02  | 0.12  | 0.04  | <0.02 | <0.05 | 0.07  | 45.44 | 52.61 | <0.45 | <0.04 | 98.29  |
| 20 | 0.35  | <0.07 | <0.02 | <0.02 | 0.04  | <0.02 | <0.02 | <0.05 | <0.05 | 44.71 | 52.97 | 0.46  | 1.74  | 98.53  |
| 21 | 0.61  | <0.07 | <0.02 | <0.02 | <0.03 | <0.02 | <0.02 | <0.05 | <0.05 | 46.25 | 52.93 | <0.45 | <0.04 | 99.79  |
| 22 | 0.45  | <0.07 | <0.02 | <0.02 | 0.04  | 0.04  | 0.02  | <0.05 | <0.05 | 46.21 | 52.90 | <0.45 | <0.04 | 99.65  |
| 23 | 0.45  | <0.07 | <0.02 | <0.02 | <0.03 | <0.02 | <0.02 | <0.05 | <0.05 | 46.60 | 53.11 | <0.45 | <0.04 | 100.15 |
| 24 | 0.49  | <0.07 | <0.02 | 0.04  | <0.03 | 0.02  | <0.02 | <0.05 | <0.05 | 45.46 | 53.50 | <0.45 | <0.04 | 99.51  |
| 25 | 0.00  | <0.07 | <0.02 | <0.02 | 0.04  | 0.03  | <0.02 | <0.05 | <0.05 | 40.20 | 52.99 | <0.45 | 5.70  | 93.25  |
| 26 | 0.03  | <0.07 | <0.02 | 0.03  | 0.34  | <0.02 | 0.02  | <0.05 | 0.10  | 45.68 | 53.11 | <0.45 | <0.04 | 99.28  |
| 27 | 0.25  | <0.07 | <0.02 | <0.02 | <0.03 | <0.02 | <0.02 | <0.05 | <0.05 | 45.98 | 53.16 | <0.45 | <0.04 | 99.40  |
| 28 | 0.91  | <0.07 | <0.02 | <0.02 | <0.03 | <0.02 | <0.02 | <0.05 | <0.05 | 45.61 | 53.51 | <0.45 | <0.04 | 100.02 |
| 29 | 0.06  | <0.07 | <0.02 | 0.02  | <0.03 | 0.03  | <0.02 | <0.05 | <0.05 | 44.69 | 52.20 | <0.45 | 2.80  | 96.99  |
| 30 | 0.68  | <0.07 | <0.02 | <0.02 | <0.03 | 0.02  | <0.02 | <0.05 | <0.05 | 45.35 | 53.22 | <0.45 | <0.04 | 99.27  |
| 31 | 0.14  | <0.07 | <0.02 | <0.02 | <0.03 | <0.02 | <0.02 | <0.05 | <0.05 | 42.75 | 52.03 | <0.45 | 4.91  | 94.92  |
| 32 | 0.31  | <0.07 | <0.02 | 0.02  | <0.03 | <0.02 | <0.02 | <0.05 | 0.11  | 43.74 | 52.74 | <0.45 | 2.95  | 96.92  |
| 33 | 0.44  | <0.07 | <0.02 | <0.02 | 0.01  | <0.02 | <0.02 | <0.05 | <0.05 | 45.62 | 52.67 | <0.45 | 0.40  | 98.73  |
| 34 | <0.04 | <0.07 | <0.02 | 0.03  | <0.03 | <0.02 | <0.02 | <0.05 | <0.05 | 43.23 | 53.16 | <0.45 | 3.74  | 96.42  |
| 35 | 0.07  | <0.07 | <0.02 | <0.02 | 0.01  | 0.02  | <0.02 | <0.05 | <0.05 | 45.79 | 53.05 | <0.45 | <0.04 | 98.94  |
| 36 | 0.04  | <0.07 | <0.02 | <0.02 | <0.03 | <0.02 | <0.02 | <0.05 | <0.05 | 42.72 | 53.45 | <0.45 | 3.59  | 96.20  |
| 37 | 0.03  | <0.07 | <0.02 | <0.02 | 0.02  | 0.03  | <0.02 | <0.05 | <0.05 | 44.03 | 53.11 | <0.45 | 1.34  | 97.23  |
| 38 | 0.01  | <0.07 | <0.02 | <0.02 | 0.21  | <0.02 | <0.02 | <0.05 | <0.05 | 42.67 | 52.82 | <0.45 | 3.20  | 95.71  |
| 39 | 0.17  | <0.07 | <0.02 | <0.02 | <0.03 | <0.02 | <0.02 | <0.05 | <0.05 | 44.61 | 53.10 | <0.45 | 1.47  | 97.88  |
| 40 | <0.04 | <0.07 | <0.02 | <0.02 | <0.03 | 0.03  | <0.02 | <0.05 | <0.05 | 42.38 | 52.71 | <0.45 | 4.91  | 95.12  |
| 41 | 0.10  | <0.07 | <0.02 | <0.02 | <0.03 | <0.02 | <0.02 | <0.05 | <0.05 | 44.94 | 53.40 | <0.45 | 1.47  | 98.44  |
| 42 | <0.04 | <0.07 | <0.02 | <0.02 | <0.03 | <0.02 | <0.02 | <0.05 | 0.04  | 45.65 | 53.29 | <0.45 | <0.04 | 98.97  |
| 43 | 0.05  | <0.07 | <0.02 | <0.02 | <0.03 | <0.02 | 0.02  | <0.05 | <0.05 | 45.28 | 52.83 | <0.45 | <0.04 | 98.18  |
| 44 | 0.04  | <0.07 | <0.02 | 0.02  | 0.18  | <0.02 | 0.02  | <0.05 | <0.05 | 44.95 | 53.13 | <0.45 | 1.34  | 98.34  |
| 45 | <0.04 | <0.07 | <0.02 | <0.02 | 0.05  | 0.02  | <0.02 | <0.05 | <0.05 | 45.34 | 52.66 | <0.45 | <0.04 | 98.08  |
| 46 | 0.03  | <0.07 | <0.02 | <0.02 | 0.03  | 0.03  | 0.02  | <0.05 | <0.05 | 45.37 | 53.42 | <0.45 | <0.04 | 98.90  |
| 47 | 0.02  | <0.07 | <0.02 | <0.02 | <0.03 | <0.02 | <0.02 | <0.05 | <0.05 | 45.63 | 53.19 | <0.45 | <0.04 | 98.84  |
| 48 | 0.17  | <0.07 | <0.02 | 0.02  | <0.03 | 0.02  | <0.02 | <0.05 | <0.05 | 45.81 | 52.65 | <0.45 | <0.04 | 98.65  |

|    |       |       |       |       |       |       |       |       |       |       |       |       |       |        |
|----|-------|-------|-------|-------|-------|-------|-------|-------|-------|-------|-------|-------|-------|--------|
| 49 | 0.66  | <0.07 | <0.02 | 0.04  | <0.03 | <0.02 | 0.02  | <0.05 | <0.05 | 46.07 | 53.26 | <0.45 | <0.04 | 100.05 |
| 50 | 0.39  | <0.07 | <0.02 | <0.02 | <0.03 | <0.02 | 0.02  | <0.05 | <0.05 | 45.70 | 52.86 | <0.45 | <0.04 | 98.97  |
| 51 | 0.03  | <0.07 | <0.02 | <0.02 | 0.06  | <0.02 | <0.02 | <0.05 | <0.05 | 46.06 | 52.58 | <0.45 | 0.81  | 98.73  |
| 52 | 0.01  | <0.07 | <0.02 | <0.02 | <0.03 | 0.02  | 0.02  | <0.05 | <0.05 | 46.14 | 52.46 | <0.45 | <0.04 | 98.65  |
| 53 | 0.25  | <0.07 | <0.02 | 0.02  | <0.03 | 0.02  | <0.02 | <0.05 | <0.05 | 46.30 | 52.91 | <0.45 | <0.04 | 99.49  |
| 54 | 0.03  | <0.07 | <0.02 | <0.02 | 0.03  | <0.02 | <0.02 | <0.05 | <0.05 | 46.48 | 53.94 | <0.45 | 0.27  | 100.48 |
| 55 | 0.65  | <0.07 | <0.02 | <0.02 | <0.03 | <0.02 | <0.02 | <0.05 | <0.05 | 42.78 | 52.38 | <0.45 | 3.45  | 95.80  |
| 56 | 0.06  | <0.07 | <0.02 | <0.02 | <0.03 | <0.02 | <0.02 | <0.05 | <0.05 | 46.26 | 52.50 | <0.45 | <0.04 | 98.82  |
| 57 | 0.03  | <0.07 | <0.02 | <0.02 | 0.09  | 0.06  | <0.02 | <0.05 | <0.05 | 46.07 | 53.30 | <0.45 | 1.19  | 99.54  |
| 58 | 0.02  | <0.07 | <0.02 | <0.02 | 0.06  | <0.02 | 0.02  | <0.05 | <0.05 | 46.59 | 52.43 | <0.45 | <0.04 | 99.12  |
| 59 | 0.74  | <0.07 | <0.02 | <0.02 | <0.03 | <0.02 | <0.02 | <0.05 | <0.05 | 46.74 | 53.33 | <0.45 | <0.04 | 100.81 |
| 60 | <0.04 | <0.07 | <0.02 | <0.02 | <0.03 | 0.02  | <0.02 | <0.05 | <0.05 | 45.47 | 53.68 | <0.45 | <0.04 | 99.17  |
| 61 | 0.59  | <0.07 | <0.02 | 0.03  | <0.03 | <0.02 | 0.02  | <0.05 | <0.05 | 45.34 | 52.46 | <0.45 | 1.74  | 98.44  |
| 62 | 0.06  | <0.07 | <0.02 | <0.02 | <0.03 | 0.03  | <0.02 | <0.05 | <0.05 | 45.42 | 53.10 | <0.45 | <0.04 | 98.60  |
| 63 | 0.14  | <0.07 | <0.02 | <0.02 | <0.03 | <0.02 | <0.02 | <0.05 | <0.05 | 43.26 | 53.39 | <0.45 | 2.27  | 96.79  |
| 64 | 0.12  | <0.07 | <0.02 | <0.02 | 0.03  | <0.02 | <0.02 | <0.05 | <0.05 | 45.74 | 52.67 | <0.45 | <0.04 | 98.55  |
| 65 | 0.08  | <0.07 | <0.02 | <0.02 | 0.04  | 0.03  | <0.02 | <0.05 | <0.05 | 46.35 | 53.43 | <0.45 | <0.04 | 99.92  |
| 66 | <0.04 | <0.07 | <0.02 | <0.02 | 0.07  | 0.04  | <0.02 | <0.05 | <0.05 | 42.83 | 53.99 | <0.45 | 3.86  | 96.93  |
| 67 | 0.01  | <0.07 | <0.02 | <0.02 | <0.03 | <0.02 | <0.02 | <0.05 | <0.05 | 46.21 | 52.57 | <0.45 | <0.04 | 98.79  |
| 68 | <0.04 | <0.07 | <0.02 | <0.02 | 0.04  | <0.02 | <0.02 | <0.05 | <0.05 | 45.89 | 53.54 | <0.45 | <0.04 | 99.47  |
| 69 | 0.00  | <0.07 | <0.02 | <0.02 | 0.39  | 0.06  | 0.02  | <0.05 | <0.05 | 46.16 | 53.37 | <0.45 | <0.04 | 100.00 |
| 70 | 0.19  | <0.07 | <0.02 | <0.02 | <0.03 | <0.02 | <0.02 | <0.05 | <0.05 | 45.67 | 53.53 | <0.45 | <0.04 | 99.39  |
| 71 | 0.94  | <0.07 | <0.02 | <0.02 | <0.03 | 0.02  | 0.03  | <0.05 | <0.05 | 45.63 | 53.63 | <0.45 | <0.04 | 100.25 |
| 72 | 0.03  | <0.07 | <0.02 | <0.02 | <0.03 | <0.02 | <0.02 | <0.05 | <0.05 | 46.34 | 53.91 | <0.45 | <0.04 | 100.27 |
| 73 | 0.12  | <0.07 | <0.02 | <0.02 | <0.03 | 0.03  | <0.02 | <0.05 | <0.05 | 46.59 | 53.03 | 0.48  | <0.04 | 100.24 |
| 74 | 0.05  | <0.07 | <0.02 | <0.02 | 0.62  | <0.02 | <0.02 | <0.05 | <0.05 | 46.45 | 52.25 | <0.45 | <0.04 | 99.37  |
| 75 | 0.19  | <0.07 | <0.02 | <0.02 | <0.03 | <0.02 | <0.02 | <0.05 | <0.05 | 44.71 | 52.14 | 0.60  | 2.67  | 97.63  |
| 76 | 0.19  | <0.07 | <0.02 | <0.02 | 0.04  | <0.02 | <0.02 | <0.05 | <0.05 | 45.85 | 52.42 | 0.15  | <0.04 | 98.65  |

Table S4. Spot analysis results of pyrite in hanging wall (sample no. 5144-179.6).

| No. | As    | Cd    | Co    | Cr    | Cu    | Mn    | Ni    | Pb    | Zn    | Fe    | S     | Au    | Ag    | Total |
|-----|-------|-------|-------|-------|-------|-------|-------|-------|-------|-------|-------|-------|-------|-------|
| 1   | <0.04 | <0.07 | <0.02 | 0.02  | 0.05  | <0.02 | <0.02 | <0.05 | <0.05 | 47.13 | 52.76 | <0.45 | <0.04 | 99.96 |
| 2   | <0.04 | <0.07 | <0.02 | 0.03  | <0.03 | <0.02 | <0.02 | <0.05 | <0.05 | 47.37 | 52.53 | <0.45 | <0.04 | 99.93 |
| 3   | <0.04 | <0.07 | <0.02 | <0.02 | <0.03 | <0.02 | <0.02 | <0.05 | <0.05 | 46.08 | 50.78 | <0.45 | 3.09  | 96.86 |
| 4   | <0.04 | <0.07 | <0.02 | <0.02 | <0.03 | 0.02  | <0.02 | <0.05 | <0.05 | 48.00 | 51.93 | <0.45 | <0.04 | 99.95 |
| 5   | <0.04 | <0.07 | <0.02 | <0.02 | <0.03 | <0.02 | <0.02 | <0.05 | <0.05 | 46.56 | 51.06 | <0.45 | 2.11  | 97.62 |
| 6   | <0.04 | <0.07 | <0.02 | 0.02  | 0.04  | 0.02  | <0.02 | <0.05 | <0.05 | 47.95 | 51.93 | <0.45 | <0.04 | 99.96 |
| 7   | <0.04 | <0.07 | <0.02 | <0.02 | <0.03 | <0.02 | <0.02 | <0.05 | <0.05 | 46.24 | 51.46 | <0.45 | 2.24  | 97.70 |
| 8   | <0.04 | <0.07 | <0.02 | <0.02 | <0.03 | <0.02 | <0.02 | <0.05 | <0.05 | 47.53 | 50.22 | <0.45 | 2.25  | 97.75 |
| 9   | <0.04 | <0.07 | <0.02 | 0.02  | 0.04  | <0.02 | <0.02 | <0.05 | <0.05 | 47.01 | 50.78 | <0.45 | 2.11  | 97.85 |
| 10  | <0.04 | <0.07 | <0.02 | <0.02 | <0.03 | <0.02 | <0.02 | <0.05 | <0.05 | 47.46 | 50.04 | <0.45 | 2.44  | 97.50 |
| 11  | <0.04 | <0.07 | <0.02 | <0.02 | <0.03 | <0.02 | <0.02 | <0.05 | <0.05 | 47.92 | 50.69 | <0.45 | 1.37  | 98.61 |

|    |       |       |       |       |       |       |       |       |       |       |       |       |       |       |
|----|-------|-------|-------|-------|-------|-------|-------|-------|-------|-------|-------|-------|-------|-------|
| 12 | <0.04 | <0.07 | <0.02 | <0.02 | <0.03 | <0.02 | <0.02 | <0.05 | <0.05 | 47.74 | 51.13 | <0.45 | 1.06  | 98.87 |
| 13 | <0.04 | <0.07 | <0.02 | <0.02 | <0.03 | 0.04  | <0.02 | <0.05 | <0.05 | 49.65 | 50.24 | <0.45 | <0.04 | 99.93 |
| 14 | <0.04 | <0.07 | <0.02 | <0.02 | 0.04  | <0.02 | <0.02 | <0.05 | <0.05 | 45.87 | 49.73 | <0.45 | 4.35  | 95.64 |
| 15 | <0.04 | <0.07 | <0.02 | <0.02 | <0.03 | 0.02  | <0.02 | <0.05 | <0.05 | 49.74 | 50.19 | <0.45 | <0.04 | 99.94 |
| 16 | <0.04 | <0.07 | <0.02 | <0.02 | <0.03 | 0.03  | <0.02 | <0.05 | <0.05 | 47.92 | 51.87 | <0.45 | <0.04 | 99.83 |
| 17 | <0.04 | <0.07 | <0.02 | <0.02 | <0.03 | 0.05  | <0.02 | <0.05 | <0.05 | 47.12 | 51.19 | <0.45 | 1.37  | 98.36 |
| 18 | <0.04 | <0.07 | <0.02 | <0.02 | 0.05  | 0.06  | <0.02 | <0.05 | <0.05 | 47.39 | 51.55 | <0.45 | 0.91  | 99.04 |
| 19 | <0.04 | <0.07 | <0.02 | <0.02 | <0.03 | <0.02 | <0.02 | <0.05 | <0.05 | 47.16 | 52.82 | <0.45 | <0.04 | 99.98 |
| 20 | <0.04 | <0.07 | <0.02 | <0.02 | <0.03 | 0.02  | <0.02 | <0.05 | <0.05 | 48.08 | 50.98 | 0.85  | <0.04 | 99.92 |
| 21 | <0.04 | <0.07 | <0.02 | <0.02 | <0.03 | 0.02  | <0.02 | <0.05 | <0.05 | 46.44 | 53.27 | <0.45 | <0.04 | 99.74 |
| 22 | <0.04 | <0.07 | <0.02 | <0.02 | 0.04  | <0.02 | <0.02 | <0.05 | <0.05 | 47.56 | 52.37 | <0.45 | <0.04 | 99.97 |
| 23 | <0.04 | <0.07 | <0.02 | <0.02 | <0.03 | <0.02 | <0.02 | <0.05 | <0.05 | 47.89 | 51.48 | <0.45 | 0.60  | 99.37 |
| 24 | <0.04 | <0.07 | <0.02 | <0.02 | <0.03 | 0.02  | <0.02 | <0.05 | <0.05 | 47.81 | 51.99 | <0.45 | <0.04 | 99.82 |
| 25 | <0.04 | <0.07 | <0.02 | <0.02 | <0.03 | <0.02 | <0.02 | <0.05 | <0.05 | 47.96 | 51.99 | <0.45 | <0.04 | 99.95 |
| 26 | <0.04 | <0.07 | <0.02 | 0.02  | <0.03 | <0.02 | <0.02 | <0.05 | <0.05 | 47.16 | 50.69 | <0.45 | 2.10  | 97.87 |
| 27 | <0.04 | <0.07 | <0.02 | <0.02 | 0.03  | <0.02 | <0.02 | <0.05 | <0.05 | 47.84 | 52.09 | <0.45 | <0.04 | 99.96 |
| 28 | <0.04 | <0.07 | <0.02 | <0.02 | <0.03 | 0.02  | <0.02 | <0.05 | <0.05 | 46.94 | 51.00 | <0.45 | 1.95  | 97.96 |
| 29 | <0.04 | <0.07 | <0.02 | <0.02 | <0.03 | 0.06  | <0.02 | <0.05 | <0.05 | 47.77 | 52.07 | <0.45 | <0.04 | 99.90 |
| 30 | <0.04 | <0.07 | <0.02 | 0.02  | <0.03 | 0.06  | <0.02 | <0.05 | <0.05 | 47.42 | 52.34 | <0.45 | <0.04 | 99.85 |
| 31 | <0.04 | <0.07 | <0.02 | <0.02 | <0.03 | <0.02 | 0.02  | <0.05 | <0.05 | 48.93 | 51.01 | <0.45 | <0.04 | 99.96 |
| 32 | <0.04 | <0.07 | <0.02 | <0.02 | 0.06  | <0.02 | <0.02 | <0.05 | <0.05 | 47.81 | 52.02 | <0.45 | <0.04 | 99.89 |
| 33 | <0.04 | <0.07 | <0.02 | <0.02 | <0.03 | <0.02 | <0.02 | <0.05 | <0.05 | 46.21 | 50.89 | <0.45 | 2.81  | 97.10 |
| 34 | <0.04 | <0.07 | <0.02 | <0.02 | 0.03  | 0.02  | <0.02 | <0.05 | <0.05 | 46.79 | 51.37 | <0.45 | 1.51  | 98.21 |
| 35 | 0.07  | <0.07 | <0.02 | <0.02 | 0.03  | 0.06  | <0.02 | <0.05 | <0.05 | 48.08 | 51.75 | <0.45 | <0.04 | 99.98 |
| 36 | <0.04 | <0.07 | <0.02 | <0.02 | <0.03 | <0.02 | 0.02  | <0.05 | <0.05 | 47.36 | 52.55 | <0.45 | <0.04 | 99.93 |
| 37 | 0.01  | <0.07 | <0.02 | 0.02  | 0.26  | 0.05  | <0.02 | <0.05 | <0.05 | 48.25 | 51.36 | <0.45 | <0.04 | 99.95 |
| 38 | <0.04 | <0.07 | <0.02 | <0.02 | <0.03 | <0.02 | <0.02 | <0.05 | <0.05 | 47.85 | 52.10 | <0.45 | <0.04 | 99.95 |
| 39 | 0.01  | <0.07 | <0.02 | 0.02  | <0.03 | <0.02 | <0.02 | <0.05 | <0.05 | 46.41 | 51.02 | <0.45 | 2.35  | 97.45 |
| 40 | 0.03  | <0.07 | <0.02 | 0.02  | <0.03 | <0.02 | <0.02 | <0.05 | 0.07  | 46.84 | 51.74 | 1.26  | <0.04 | 99.95 |
| 41 | <0.04 | <0.07 | <0.02 | 0.02  | 0.03  | <0.02 | <0.02 | <0.05 | <0.05 | 47.68 | 51.11 | <0.45 | 1.10  | 98.84 |
| 42 | 0.01  | <0.07 | <0.02 | <0.02 | 0.05  | <0.02 | <0.02 | <0.05 | <0.05 | 48.33 | 51.59 | <0.45 | <0.04 | 99.98 |
| 43 | <0.04 | <0.07 | <0.02 | <0.02 | 0.09  | <0.02 | <0.02 | <0.05 | <0.05 | 48.86 | 50.98 | <0.45 | <0.04 | 99.93 |
| 44 | 0.06  | <0.07 | <0.02 | <0.02 | 0.06  | <0.02 | <0.02 | <0.05 | <0.05 | 48.40 | 51.45 | <0.45 | <0.04 | 99.97 |
| 45 | <0.04 | <0.07 | <0.02 | <0.02 | 0.03  | <0.02 | 0.02  | <0.05 | <0.05 | 47.64 | 51.30 | 0.65  | 0.35  | 99.63 |
| 46 | <0.04 | <0.07 | <0.02 | <0.02 | 0.03  | <0.02 | 0.02  | <0.05 | <0.05 | 46.77 | 50.57 | 0.58  | 2.03  | 97.95 |
| 47 | <0.04 | <0.07 | <0.02 | <0.02 | 0.01  | 0.03  | <0.02 | <0.05 | <0.05 | 47.77 | 50.89 | <0.45 | 1.27  | 98.70 |

**Table S5.** Chemical composition (.wt%) of Calcite. Formula calculated on the basis of sum cations = 1, CO<sub>2</sub> calculated by stoichiometry.

| Label | 5144-195-<br>cc1 | 5144-195-<br>cc2 | 5144-195-<br>cc3 | 5144-195-<br>cc4 | 5144-195-<br>cc5 | 5144-195-<br>cc6 | 5144-195-<br>cc7 |
|-------|------------------|------------------|------------------|------------------|------------------|------------------|------------------|
| MgO   | 0.19             | 0.13             | 0.21             | 0.15             | 0.17             | 0.30             | 0.19             |
| MnO   | 1.00             | 1.35             | 1.28             | 0.86             | 1.02             | 1.27             | 1.12             |

|       |       |       |       |       |       |       |       |
|-------|-------|-------|-------|-------|-------|-------|-------|
| CaO   | 52.56 | 51.96 | 51.46 | 52.65 | 52.12 | 52.13 | 52.16 |
| FeO   | 0.01  | 0.07  | 0.02  | 0.00  | 0.00  | 0.02  | 0.02  |
| CO2*  | 46.03 | 46.34 | 46.76 | 46.10 | 46.42 | 46.08 | 46.29 |
| Total | 99.78 | 99.85 | 99.73 | 99.76 | 99.73 | 99.79 | 99.77 |
| Mg    | 0.005 | 0.003 | 0.006 | 0.004 | 0.005 | 0.008 | 0.005 |
| Mn    | 0.015 | 0.020 | 0.019 | 0.013 | 0.015 | 0.019 | 0.017 |
| Ca    | 0.980 | 0.976 | 0.975 | 0.983 | 0.980 | 0.973 | 0.978 |
| Fe    | 0.000 | 0.001 | 0.000 | 0.000 | 0.000 | 0.000 | 0.000 |
| CO2   | 1.000 | 1.000 | 1.000 | 1.000 | 1.000 | 1.000 | 1.000 |
| Total | 2.000 | 2.000 | 2.000 | 2.000 | 2.000 | 2.000 | 2.000 |

Table S6. Mole% of FeS in sphalerite.

| AsS   | CdS   | CoS   | CrS   | CuS   | MnS   | NiS   | PbS   | ZnS    | FeS   | AuS   | AgS   | total   |
|-------|-------|-------|-------|-------|-------|-------|-------|--------|-------|-------|-------|---------|
| 0.000 | 0.000 | 0.000 | 0.000 | 1.842 | 0.000 | 0.028 | 0.000 | 91.168 | 6.508 | 0.454 | 0.000 | 100.000 |
| 0.000 | 0.069 | 0.000 | 0.000 | 2.506 | 0.105 | 0.000 | 0.035 | 90.632 | 6.653 | 0.000 | 0.000 | 100.000 |
| 0.000 | 0.060 | 0.000 | 0.000 | 2.850 | 0.035 | 0.000 | 0.000 | 90.917 | 5.761 | 0.376 | 0.000 | 100.000 |
| 0.000 | 0.000 | 0.000 | 0.045 | 3.063 | 0.000 | 0.000 | 0.044 | 93.295 | 3.122 | 0.366 | 0.065 | 100.000 |
| 0.000 | 0.000 | 0.000 | 0.000 | 2.243 | 0.000 | 0.000 | 0.039 | 94.547 | 2.687 | 0.347 | 0.136 | 100.000 |
| 0.000 | 0.000 | 0.000 | 0.033 | 1.459 | 0.110 | 0.000 | 0.037 | 94.917 | 3.045 | 0.399 | 0.000 | 100.000 |
| 0.000 | 0.061 | 0.000 | 0.000 | 1.279 | 0.000 | 0.000 | 0.000 | 93.239 | 4.942 | 0.478 | 0.000 | 100.000 |
| 0.000 | 0.105 | 0.000 | 0.000 | 1.238 | 0.125 | 0.000 | 0.000 | 92.869 | 4.972 | 0.692 | 0.000 | 100.000 |
| 0.000 | 0.160 | 0.000 | 0.082 | 1.543 | 0.036 | 0.000 | 0.000 | 93.997 | 3.910 | 0.273 | 0.000 | 100.000 |
| 0.000 | 0.000 | 0.000 | 0.040 | 2.546 | 0.000 | 0.000 | 0.023 | 92.513 | 4.386 | 0.492 | 0.000 | 100.000 |
| 0.000 | 0.132 | 0.000 | 0.000 | 1.735 | 0.000 | 0.000 | 0.000 | 93.606 | 4.044 | 0.483 | 0.000 | 100.000 |
| 0.000 | 0.152 | 0.000 | 0.000 | 0.079 | 0.000 | 0.000 | 0.019 | 94.683 | 4.373 | 0.694 | 0.000 | 100.000 |
| 0.000 | 0.000 | 0.000 | 0.061 | 0.834 | 0.000 | 0.000 | 0.000 | 94.556 | 4.549 | 0.000 | 0.000 | 100.000 |
| 0.000 | 0.114 | 0.000 | 0.000 | 1.101 | 0.000 | 0.035 | 0.000 | 93.895 | 4.855 | 0.000 | 0.000 | 100.000 |
| 0.000 | 0.000 | 0.000 | 0.000 | 2.379 | 0.000 | 0.000 | 0.000 | 92.806 | 4.815 | 0.000 | 0.000 | 100.000 |
